## **Effect of APOE $\epsilon$ 4 and its modification by sociodemographic characteristics on cognitive measures in South Asians from LASI-DAD**

Yi Zhe Wang,<sup>1</sup> Wei Zhao,<sup>1,2</sup> Priya Moorjani,<sup>3,4</sup> Alden L. Gross,<sup>5</sup> Xiang Zhou,<sup>6</sup> Aparajit B. Dey,<sup>7</sup> Jinkook Lee,<sup>8</sup> Jennifer A. Smith,<sup>1,2,†</sup> Sharon L.R. Kardia<sup>1,†</sup>

<sup>1</sup>*Department of Epidemiology, School of Public Health, University of Michigan, 1415 Washington Heights, Ann Arbor, MI 48109, United States of America*

<sup>2</sup>*Survey Research Center, Institute for Social Research, University of Michigan, 426 Thompson Street, Ann Arbor, MI 48109, United States of America*

<sup>3</sup>*Department of Molecular and Cell Biology, University of California, Berkeley, 176 Stanley Hall #3220, Berkeley, CA 94720, United States of America*

<sup>4</sup>*Center for Computational Biology, University of California, Berkeley, 176 Stanley Hall #3220, Berkeley, CA 94720, United States of America*

<sup>5</sup>*Johns Hopkins Bloomberg School of Public Health, 2024 E Monument St, Baltimore, MD 21205, United States of America*

<sup>6</sup>*Department of Biostatistics, School of Public Health, University of Michigan, 1415 Washington Heights, Ann Arbor, MI 48109, United States of America*

<sup>7</sup>*Department of Geriatric Medicine, All India Institute of Medical Sciences, Ansari Nagar, New Delhi 110029, India*

<sup>8</sup>*Department of Economics and Center for Social Research, University of Southern California, 635 Downey Way, VPD 305, Los Angeles, CA 90089, United States of America*

<sup>†</sup>*These authors contributed equally to this manuscript*

**Abstract: 140 words**

**Main text: 5,037 words**

**Tables: 6**

**Figures: 2**

Corresponding author:

Jennifer A. Smith

Department of Epidemiology

School of Public Health

University of Michigan

1415 Washington Heights, #2631

Ann Arbor, MI 48109

Email: [smjenn@umich.edu](mailto:smjenn@umich.edu)

## ABSTRACT

**BACKGROUND:** We investigated effects of *APOE*  $\epsilon 4$  and its interactions with sociodemographic characteristics on cognitive measures in 2,563 South Asians from the Diagnostic Assessment of Dementia for the Longitudinal Aging Study of India (LASI-DAD).

**METHODS:** Linear regression models were used to assess the association between *APOE*  $\epsilon 4$  and global- and domain-specific cognitive function. Effect modification by age, sex, and education were explored using cross-product interaction terms and subgroup analyses.

**RESULTS:** *APOE*  $\epsilon 4$  was inversely associated with most cognitive measures. This association was stronger in the older age group (age >68) for general cognitive function, orientation, and language/fluency, as well as in females for memory and language/fluency. Interaction between *APOE*  $\epsilon 4$  and education was mostly nonsignificant.

**DISCUSSION:** *APOE*  $\epsilon 4$  is associated with lower cognitive function in South Asians from India, with a more pronounced impact observed in females and older individuals.

## 1 INTRODUCTION

Dementia, a group of neurological disorders characterized by impaired cognitive function, is a leading cause of death, disability, and dependency among older adults worldwide [1,2].

Dementia and cognitive function have significant genetic components, with the  $\epsilon 4$  allele of the apolipoprotein E (*APOE*) gene being the strongest genetic risk factor for late-onset Alzheimer's disease (AD) in many populations [3–5]. For instance, compared to the most common and risk-neutral  $\epsilon 3/\epsilon 3$  genotype in European ancestry populations, having one  $\epsilon 4$  allele is associated with an increase of 2-3 times in the risk of AD, while having two  $\epsilon 4$  alleles is associated with an increase in risk of up to 15 times [6]. Conversely, the  $\epsilon 2$  allele has been generally associated with reduced AD risk. These *APOE* alleles have also been linked, to a lesser extent, with global cognition and performance in specific cognitive domains including episodic memory, executive function, and verbal fluency in individuals without dementia [7].

Sociodemographic factors such as age, sex, and education are also associated with cognitive function in older adults[8] and contribute to the risk of dementia [9,10]. A growing body of literature has explored the potential interaction between *APOE*  $\epsilon 4$  and these sociodemographic characteristics, yet the evidence remains inconclusive. Specifically, some studies report that the effect of *APOE*  $\epsilon 4$  on AD may be more pronounced in young-old adults (e.g., 60-70 years) than in those who are older (>70 years) [6,11,12], females than males [6,13–15], and in those with lower education [16,17]. Similar findings are observed for the interactions of *APOE*  $\epsilon 4$  with sex and education with cognitive function as the outcome [18–21]. However, in contrast to AD, the effect of *APOE*  $\epsilon 4$  on cognitive function appears to increase progressively with age [22,23]. Other studies, however, have failed to detect any interactions between *APOE*

$\epsilon 4$  and age, sex, or education in relation to cognitive function and dementia [24–27]. Therefore, it is still unclear to what extent these sociodemographic factors modulate *APOE*  $\epsilon 4$  associations.

To date, the vast majority of genomic studies on cognitive function and dementia have been conducted in European ancestry populations [28–32]. India is the most populous country in the world with over 4.1 billion people estimated to have dementia [2], yet Indian and South Asian populations in general are rarely represented in genomic studies. This lack of representation is concerning as differences in allele frequencies and linkage disequilibrium (LD) patterns across ancestry groups could result in varying genetic effects and associations with disease [33]. Indeed, there is some evidence that the effect of *APOE*  $\epsilon 4$  on cognitive function and dementia differs across ancestries and race/ethnicities [34]. An early meta-analysis of clinical and autopsy-based studies, for example, found that the association between *APOE*  $\epsilon 4$  and AD was weaker among African Americans and Hispanics compared to Caucasians, but stronger in Japanese [6]. In India, the few studies that have investigated the relationship between *APOE*  $\epsilon 4$  and AD suggest that its effect size is similar to that observed in populations of European ancestry [35–38]. However, prior studies in India have primarily relied on geographically restricted samples. Furthermore, India possesses unique cultural, social, and environmental characteristics, such as dietary practices and pathogen or toxicant exposures, that further distinguish it from populations of European ancestry. These closely intertwined factors may be associated with cognitive function and dementia and/or may modulate the genetic effect of *APOE*  $\epsilon 4$  in various ways. Therefore, large-scale epidemiological studies employing nationally representative data are needed to comprehensively explore the effects of *APOE*  $\epsilon 4$  on cognition and dementia and identify potential effect modifiers in Indian/South Asian populations.

The Diagnostic Assessment of Dementia for Longitudinal Aging Study in India (LASI-DAD) is a population-based prospective cohort study that has collected nationally representative data on Indians aged 60 and older to better understand the determinants of late-life cognition, cognitive aging, and dementia. In this study, we examined the effect of the *APOE*  $\epsilon 4$  allele and its potential modification by sociodemographic factors including age, sex, and education on cognitive measures in LASI-DAD.

## 2 METHODS

### 2.1 Study population

The Longitudinal Aging Study of India (LASI) is a nationally representative sample of more than 73,000 adults from India aged 45 years or older [39]. LASI-DAD is an add-on study of late-life cognition and dementia, in which a subsample of community-residing LASI respondents aged 60 or older were administered in-depth cognitive tests and informant interviews, adopting the Harmonized Cognitive Assessment Protocol (HCAP) developed by the Health and Retirement Study (HRS) to be suitable for the local context and population characteristics [40]. A two-stage stratified random sampling method was used in LASI-DAD to ensure a sample with a broad distribution of cognitive ability including respondents with dementia and mild cognitive impairment (MCI). The respondents were stratified according to their state of residence and their risk of cognitive impairment based on their performance on the cognitive tests and proxy interview (i.e., interview with a family member when the respondent is incapable of participating in the interview) in the main LASI study. Next, within each state, a predetermined sample size proportional to the state's population size was used to randomly select an equal number of respondents at high and low risk of cognitive impairment [40]. The baseline

(Wave 1) LASI-DAD sample consists of 4,096 older adults aged 60 or older, representing >600 ethnically and geographically diverse areas within 18 states and union territories.

## 2.2 Measures

### 2.2.1 Whole Genome Sequencing

Whole genome sequencing (WGS) was performed on a total of 2,762 LASI-DAD participants who consented to blood sample collection at MedGenome, Inc (Bangalore, India) at an average read depth of 30. Genotype calling and quality control (QC) on the raw LASI-DAD WGS data were performed at the Genome Center for Alzheimer's Disease (GCAD) at the University of Pennsylvania [41,42]. Briefly, sample-level quality control included checks for low coverage, sample contamination, sex discrepancies, concordance with previous genotype data, and duplicates [41]. After excluding control samples and samples with low quality and/or unresolved identity, a total of 2,680 samples were retained in the analysis. At the genotype level, each genotype was evaluated and set to missing if read depth was less than 10 ( $DP < 10$ ) or genotype quality score was less than 20 ( $GQ < 20$ ). At the variant level, a variant was excluded if it was monomorphic, was above the 99.8% Variant Quality Score Recalibration (VQSR) Tranche (the quality score was beyond the range that contains 99.8% of true variants), had a call rate  $\leq$  80%, or had an average mean depth  $> 500$  reads. We further removed variants that were in low complexity regions identified with mdust [43]. After quality control and filtering, we retained a total of 71,109,961 autosomal bi-allelic variants that include 66,204,161 single nucleotide polymorphisms (SNPs) and 4,905,800 indels. Genetic principal components (PCs) were calculated using PCAir [44] to take into account the relatedness in the samples. Specifically, the PCs were first calculated in a set of unrelated individuals (kinship cutoff=0.044) and then

projected to all other individuals. For this analysis, we included 2,607 individuals that are not related at 3rd degree or above. The top 10 PCs were included in all analyses to adjust for population stratification.

### **2.2.2 APOE Genotyping**

*APOE*  $\epsilon 2$ ,  $\epsilon 3$ , and  $\epsilon 4$  alleles are defined by two SNPs (rs429358 and rs7412) that lead to changes in the amino acid sequence at positions 112 and 158. Direct genotyping for these *APOE* SNPs was performed on 2,754 LASI-DAD participants using TaqMan assays (Applied Biosystems, Foster City, CA). The resulting genotypes of these two SNPs were then combined to form six possible *APOE* genotypes:  $\epsilon 2/\epsilon 2$ ,  $\epsilon 2/\epsilon 3$ ,  $\epsilon 2/\epsilon 4$ ,  $\epsilon 3/\epsilon 3$ ,  $\epsilon 3/4$ , and  $\epsilon 4/\epsilon 4$ . In our primary analyses, we dichotomized *APOE* genotypes based on the presence or absence of the  $\epsilon 4$  alleles and classified participants as *APOE*  $\epsilon 4$  carriers (i.e.,  $\epsilon 3/4$ , and  $\epsilon 4/\epsilon 4$ ) or noncarriers (i.e.,  $\epsilon 2/\epsilon 2$ ,  $\epsilon 2/\epsilon 3$ , and  $\epsilon 3/\epsilon 3$ ). We focused on the 2,590 unrelated participants who had both WGS and *APOE* genotyping data. Due to the potential opposing effects of the  $\epsilon 4$  and  $\epsilon 2$  alleles on cognitive measures, individuals with the *APOE*  $\epsilon 2/\epsilon 4$  genotype were further excluded from the analyses (N= 27, 1.0%). This left 2,563 participants for inclusion in the primary analyses. A study flow chart is presented in **Supplementary Figure 1**.

### **2.2.3 Cognitive measures**

We examined a total of seven cognitive measures, including the Hindi Mental State Examination (HMSE) score, five broad cognitive domain scores (orientation, memory, executive functioning, language/fluency, and visuospatial), and a general cognitive function summary score constructed from the five domains. The HMSE score is the Hindi version of the Mini-Mental State Examination (MMSE), a widely used cognitive screening instrument [45]. The



HMSE score ranges from 0 to 30, with higher scores indicating better cognitive functioning.

General cognitive function and domain-specific cognitive performance were derived using factor analysis of the LASI-DAD cognitive battery, as described by Gross et al.[46] These scores were internally standardized to a  $N(0,1)$  distribution in the entire sample of 4,096 LASI-DAD participants.

## **2.2.4 Covariates and effect modifiers**

We examined several sociodemographic and socioeconomic characteristics that were self-reported by the participants at baseline as covariates. Sociodemographic factors included age, sex, educational level according to a three-tier simplified version of the 1997 International Standard Classification of Education (ISCED-97) codes (less than secondary education, upper secondary education and vocational training, or tertiary education), urban/rural residence, literacy (can read or write), and state of residence. We also included caste and per capita household consumption (in rupees) as measures of socioeconomic status. Respondents self-reported their caste and were classified into four official categories recognized by the Indian government: scheduled caste, scheduled tribe, other backward class (OBC), or no caste/other caste. Per capita household consumption was used to capture the economic status of the respondents and was calculated by taking total household consumption over the previous year for food, household utilities, fees, durable goods, education, healthcare, discretionary spending, transit, and remittances divided by the number of people in the household.

Age, sex, and education were also assessed as potential effect modifiers of the association between *APOE*  $\epsilon 4$  and cognitive function. We examined the interaction between  $\epsilon 4$  and education using the three-level categorical education variable described above. Nearly half of our

sample (~48.7%) had never attended school, which aligns with the 56.5% illiteracy rate among older adults in India [47]. Thus, we further investigated the interaction between *APOE*  $\epsilon 4$  and a dichotomous education variable, distinguishing between individuals with no formal education and those with any formal education (0 years of education vs. >0 years of education groups). Furthermore, to facilitate interaction and subgroup analyses, age was dichotomized at the sample median ( $\leq 68$  years vs.  $>68$  years) when analyzed as an effect modifier.

### 2.3 Statistical analysis

The distribution of *APOE* genotypes and allele frequencies were calculated for the full study sample, and Hardy-Weinberg equilibrium was assessed. *APOE* genotype and allele frequencies were additionally estimated by 5-year age group ranging from 60 years (smallest age of the sample) to  $\geq 85$  years. We compared and tested whether the *APOE*  $\epsilon 4$  allele frequency differed by age to assess a potential selective survival bias. Descriptive statistics of the analytic sample were compared by *APOE*  $\epsilon 4$  carrier status using t-test, Wilcoxon rank-sum test, and Pearson chi-square test as appropriate.

We first examined the association between *APOE*  $\epsilon 4$  (carrier vs. non-carrier) and cognitive measures in the full analytic sample using linear regression models. We then tested the interaction between *APOE*  $\epsilon 4$  and age, sex, or education by including the two independent variables and their cross-product term into the same model. We further conducted age-, sex-, and education-stratified analyses to estimate the  $\epsilon 4$  effects separately within each subgroup, regardless of whether an interaction was detected. We employed two sets of models for all analyses. Model 1 adjusted for age (if applicable), sex (if applicable), state of residence, and the top 10 genetic PCs. Model 2 additionally adjusted for social- and economic-related variables

including educational level (if applicable), literacy, urban/rural residence, caste, and per capita household consumption.

As a sensitivity analysis, we repeated all analyses to examine the effects of specific *APOE* genotypes and their modification by age, sex, and education on cognitive measures. In this analysis, we excluded individuals with the  $\epsilon 2/\epsilon 4$  (protective/risk allele) and  $\epsilon 2/\epsilon 2$  (low frequency; N=5) genotypes, and focused on the remaining four possible *APOE* genotypes:  $\epsilon 3/\epsilon 3$  (reference group),  $\epsilon 2/\epsilon 3$ ,  $\epsilon 3/\epsilon 4$ , and  $\epsilon 4/\epsilon 4$ . We did not test the interaction between *APOE* genotypes and the three-tier education variable due to the smaller subgroup sample sizes.

### 3 RESULTS

#### 3.1 Sample characteristics

**Supplementary Table 1** provides the distribution of *APOE* genotypes and alleles in the full study population, as well as by 5-year age intervals ranging from 60 years to  $\geq 85$  years. The allele frequencies of *APOE*  $\epsilon 2$ ,  $\epsilon 3$ , and  $\epsilon 4$  were 0.048, 0.844, and 0.108, respectively. There was no significant difference in the frequency of the  $\epsilon 4$  allele by age when compared across 5-year age groups ( $p = 0.813$ ) (**Supplementary Table 1 and Supplementary Figure 2**). About 19% ( $n = 497$ ) of the participants were classified as *APOE*  $\epsilon 4$  carriers (18%  $\epsilon 3/\epsilon 4$  heterozygotes and 1%  $\epsilon 4/\epsilon 4$  homozygotes). Genotype frequencies observed in the full study sample were in Hardy-Weinberg equilibrium ( $p = 0.667$ ).

Descriptive statistics for sociodemographic characteristics and cognitive measures by *APOE*  $\epsilon 4$  carrier status are shown in **Table 1**. The mean age of the participants was 69.56 years (SD 7.29) and approximately 53% ( $n = 1,358$ ) were female. Seventy-five percent ( $n=1,926$ ) had

less than lower secondary education, with 48.7% (n= 1,249) participants having no formal education. Twenty-one percent (n= 542) had upper secondary or vocational training, and 4% (n=95) had tertiary education. *APOE*  $\epsilon$ 4 carriers and noncarriers did not differ with respect to age, sex, and state of residence. However, compared to *APOE*  $\epsilon$ 4 noncarriers,  $\epsilon$ 4 carriers were more likely to have less than upper secondary education, reside in rural areas, and score lower on all cognitive measures except visuospatial functioning. Significant differences in caste and per capita household consumption were also found between *APOE*  $\epsilon$ 4 carriers and noncarriers.

**Supplementary Table 2** provides the correlation among the seven cognitive measures examined in this study. The correlation among the five cognitive domain scores ranged from 0.491 to 0.733. The correlations between the five domain scores and general cognitive function and HMSE ranged from 0.733 to 0.948 and from 0.560 to 0.856, respectively.

### **3.2 *APOE* $\epsilon$ 4 and sociodemographic characteristic associations with cognitive measures**

**Table 2** presents the associations between *APOE*  $\epsilon$ 4 and cognitive measures in the full sample. All effect estimations were in the expected direction, with  $\epsilon$ 4 carriers having lower cognitive function. In models adjusting for age, sex, state of residence, and the top 10 genetic PCs (Model 1),  $\epsilon$ 4 carrier status was associated with all cognitive measures except visuospatial functioning ( $p < 0.05$ ). Specifically, being an  $\epsilon$ 4 carrier was associated with a 0.095 – 0.142 SD decrease in cognitive scores and a 0.978 points reduction in HMSE score. The associations were slightly attenuated after further controlling for education, literacy, urban/rural residence, caste, and per capita household consumption in Model 2. Nevertheless, the association between *APOE*  $\epsilon$ 4 and HMSE score, general cognitive function, orientation, and memory remained significant ( $p < 0.05$ ).

Effect estimates and p-values for all other covariates in Models 1 and 2 can be found in **Supplementary Tables 3 and 4**, respectively. In Model 1, older age was inversely associated with all cognitive measures, while male sex was positively associated with all cognitive measures. These associations stayed largely consistent in Model 2. Education was also independently associated with all cognitive measures. Compared to individuals with less than lower secondary education, those with upper secondary or vocational training education showed a 0.179-0.458 SD increase in cognitive scores and a 1.480 point increase in HMSE score, while those with tertiary education showed a 0.327-0.893 SD increase in cognitive scores and a 2.392 points increase in HMSE score.

Collectively, *APOE*  $\epsilon 4$  carrier status and other covariates in Model 1 explained approximately 18.6% (visuospatial function) to 33.9% (general cognitive function) of the total variance in cognitive measures. Specifically,  $\epsilon 4$  carrier status alone contributed between 0.09% (visuospatial function) and 0.51% (HMSE score) of the explained variance. The total variance explained increased to 37.9-62.4% when education, literacy, urban/rural residence, caste, and per capita household consumption were added to the model (Model 2). In this further adjusted model, the individual contribution of  $\epsilon 4$  carrier status to the total variance explained ranged from 0.01% to 0.27%.

### **3.3 Effect modification of age, sex, and education on the associations between *APOE* $\epsilon 4$ and cognitive measures**

We next examined whether the associations of *APOE*  $\epsilon 4$  with cognitive measures were modified by age, sex, and education. **Table 3** provides the results from testing the *APOE*  $\epsilon 4 \times$  age > 68 years interaction term. We found a significant *APOE*  $\epsilon 4$  by age interaction on general

cognitive function, orientation, and language/fluency in Model 2, with the associations being more pronounced in the > 68 years age group (**Figure 1**). Results from age-stratified analysis suggest that the detected interactions were mainly driven by the significant  $\epsilon 4$  effects on cognitive function, orientation, and language/fluency in the > 68 years age group that were not observed in the  $\leq 68$  years age group (**Table 4**). We also observed similar results for several of the other cognitive measures, where the  $\epsilon 4$  effect was significant solely in the older age group.

**Table 5** presents the results from testing the *APOE*  $\epsilon 4$  by sex interaction term. In Model 1, an *APOE*  $\epsilon 4 \times$  male interaction was observed for language/fluency and memory, with the effect of  $\epsilon 4$  stronger in females. While the interaction terms were not statistically significant for the other cognitive measures, sex-stratified analysis showed that *APOE*  $\epsilon 4$  was associated with all cognitive measures among females except visuospatial functioning, whereas there was no association between  $\epsilon 4$  and any cognitive measures among males (**Table 6**). Sex differences in the  $\epsilon 4$  effect attenuated in Model 2, but the *APOE*  $\epsilon 4 \times$  male sex interaction term remained statistically significant for both language/fluency and memory (**Figure 2, Tables 5 and 6**).

**Supplementary Table 5** provides the results from testing the *APOE*  $\epsilon 4$  by education interaction terms. Using the three-level education variable, all interaction terms between *APOE*  $\epsilon 4$  and education were not statistically significant except the interaction between  $\epsilon 4$  and upper secondary or vocational training on visuospatial function. A closer examination of the education-stratified analysis showed that most significant  $\epsilon 4$  associations were predominantly observed in the less than lower secondary education group (**Supplementary Table 6**). Given that this group constituted ~75% of our sample, with more than 64% of them having no formal education, we further explored the *APOE*  $\epsilon 4$  by education interaction by separating our sample into two categories: those with no formal education (0 years of education) and those with any type of

formal education (>0 years of education). We found no interaction between *APOE*  $\epsilon 4$  and the dichotomous education variable on any of the cognitive measures (**Supplementary Table 7**). However, when we examined the  $\epsilon 4$  associations with cognitive measures separately within these two subgroups, we observed that  $\epsilon 4$  was associated with all cognitive measures except visuospatial function among individuals without formal education in Model 1 (**Supplementary Table 8**). In contrast, among those who had received some education,  $\epsilon 4$  was only associated with HMSE score and orientation domain score. This pattern of association largely persisted in Model 2, except for the loss of significance in the associations between  $\epsilon 4$  and executive function and language/fluency among those with no formal education.

### 3.4 Sensitivity analysis

Sensitivity analyses examining *APOE* genotypes showed that the main effect of  $\epsilon 3/\epsilon 4$  compared to  $\epsilon 3/\epsilon 3$ , as well as its potential modification by age, sex, and education closely mirrored what we observed for  $\epsilon 4$  carriers in the primary analyses (**Supplementary Tables 9-15**). Furthermore, even though not statistically significant, we found that the effect of  $\epsilon 4/\epsilon 4$  on cognitive function was in the expected direction, with lower scores observed among  $\epsilon 4/\epsilon 4$  compared to  $\epsilon 3/\epsilon 3$  in the full sample and within age, sex, and education subgroups. Contrary to our expectation based on previous literature, we did not consistently observe a clear dose-response relationship between the number of  $\epsilon 4$  alleles and worse cognitive function, as indicated by the smaller magnitude of effect in  $\epsilon 4/\epsilon 4$  homozygotes compared to  $\epsilon 3/\epsilon 4$  heterozygotes in the full sample, as well as within subgroups of age  $\leq 68$ , male sex, and 0 years of education (**Supplementary Tables 9, 11, 13, and 15**). However, we caution that our sample included only a small number of individuals carrying the  $\epsilon 4/\epsilon 4$  genotype (n=36), which likely contributed to our inability to establish statistically significant associations or interactions.

Finally, results from the sensitivity analyses also revealed an association between *APOE*  $\epsilon 2/\epsilon 3$  genotype and lower visuospatial function when compared to  $\epsilon 3/\epsilon 3$  (**Supplementary Table 9**). We did not detect any significant interactions between the  $\epsilon 2/\epsilon 3$  genotype and age, sex, or education (**Supplementary Table 10, 12, and 14**). Nevertheless, an adverse effect of the  $\epsilon 2/\epsilon 3$  genotype on visuospatial function was found among females and individuals aged 68 years and older, but not among males and those younger than 68 years (**Supplementary Tables 11 and 13**).

#### 4 DISCUSSION

In this large, nationally representative sample of Indians aged 60 and older, *APOE*  $\epsilon 4$  carrier status was associated with lower cognitive function, both globally and in multiple specific domains. We also found that females may be more susceptible to  $\epsilon 4$  effects on memory and language/fluency, while those aged 68 years and older may be more susceptible to  $\epsilon 4$  effects on general cognitive function, orientation, and language/fluency. The  $\epsilon 4$  frequency was 10.8% in our sample, which is consistent with the 10.0%  $\epsilon 4$  frequency reported in the Genome Aggregation Database (gnomAD) for South Asians [48] and reaffirms the relatively lower  $\epsilon 4$  prevalence among South Asians compared to the global frequency of 14% [3]. However, this allele is important as it remains the strongest known genetic risk factor for AD and cognitive function/decline worldwide. Studying its effect on cognitive function contributes to our overall understanding of the genetic architecture of cognitive aging in the Indian population.

We found modest adverse effects of *APOE*  $\epsilon 4$  on a broad range of cognitive domains. Direct comparison of  $\epsilon 4$  effects on cognition is challenging as methodological factors, including sample size, study population (e.g., participant age range), and study design (e.g., measurement and modeling of cognitive measures), may vary substantially across studies. Nonetheless, the



observed domain specificity of  $\epsilon 4$  effects on cognition in our study is in line with two previous meta-analyses in cognitively healthy individuals of European ancestry which indicate that  $\epsilon 4$  carriers perform worse on measures of global cognition and episodic memory, but not on language/fluency (verbal ability) and visuospatial function [22,49]. However, contrary to these meta-analyses, we did not find an association between  $\epsilon 4$  carrier status and executive function after adjusting for sociodemographic and socioeconomic factors. These results also differ slightly from earlier LASI-DAD studies [50,51], which examined genotype chip data on 932 participants and found no significant  $\epsilon 4$  effects on cognition, potentially due to inadequate power and a more restricted geographic sample than the current study.

We also found a relatively consistent, though not always statistically significant, pattern across cognitive measures whereby the magnitudes of the  $\epsilon 4$  effects on cognition appeared stronger among those at least 68 years than younger individuals. This is consistent with several studies indicating that the negative effect of *APOE*  $\epsilon 4$  on cognitive function increases with advancing age [22,52,53]. The molecular mechanisms underlying the potential age-dependent  $\epsilon 4$  effects on cognitive function remain unknown. One possibility is the resource modulation hypothesis [53], which posits that effects of common genetic variants, such as *APOE*, may become stronger in older age when neurochemical and anatomical brain resources are declining [54,55]. However, the observed interaction between  $\epsilon 4$  and age could also be explained by the increasing presence of preclinical, mildly cognitively impaired, or diagnosed dementia cases with advancing age, as  $\epsilon 4$  may be more robustly associated with these cases, creating a seemingly stronger association between  $\epsilon 4$  and cognition in older individuals. Not all studies have observed this interaction [49,56]. In fact, one study showed that  $\epsilon 4$  effects on global cognitive functioning and episodic memory were inversely related to age, although these

correlations were not statistically significant [49]. These inconsistent findings may be partly due to methodologic differences, such as sample size, age range of the participants, and measurements of cognitive function across studies.

We found that the association between *APOE*  $\epsilon 4$  and cognition was stronger in females than males for language/fluency and memory, which is consistent with a growing body of literature. For instance, early studies found that the  $\epsilon 4$  allele confers a greater risk for AD in women than men [57,58]. These findings were replicated in a seminal meta-analysis that reported that female  $\epsilon 4$  carriers had a higher risk of developing AD compared to both female  $\epsilon 4$  noncarriers and male  $\epsilon 4$  carriers [6]. More recently, studies have shown that  $\epsilon 4$  effects on AD biomarkers, including cerebrospinal fluid biomarkers (Amyloid- $\beta$  and tau), brain metabolism, and brain structure [15,59–61], as well as on cognitive function and decline [18,62,63], are also stronger in females. Although the precise biological mechanisms underlying these observed sex differences remain largely unclear, there is compelling biological plausibility. For example, *APOE* may interact with estrogen through various pathways such that the presence of the  $\epsilon 4$  allele exacerbates the female-specific effects of fluctuations/loss of estrogens during perimenopause and postmenopause on AD [64]. Alternatively, the observed sex differences in our sample may, in part, stem from a more pronounced selection bias among males. *APOE*  $\epsilon 4$  has pleiotropic effects on cardiovascular disease and mortality, and males may have a higher risk of cardiovascular disease and mortality through *APOE*-related mechanisms and other pathways [19]. Our LASI-DAD sample is generally older and thus more likely to include healthier male  $\epsilon 4$  carriers who demonstrate resilience against the detrimental  $\epsilon 4$  effects on cognitive function and age-related diseases. Consequently, our study may underestimate the association between  $\epsilon 4$  and cognition in males. Indeed, while our findings align with the majority of studies examining sex

differences, a few studies have reported conflicting findings [26,65]. For instance, a recent study in UK Biobank participants with white British ancestry found no significant interactions between  $\epsilon 4$  and sex on cognitive abilities [65]. Further investigation is required to elucidate the observed sex-specific  $\epsilon 4$  effects on cognitive function and dementia in diverse populations.

In our study, as expected, having at least some formal education was associated with better cognitive performance. However, this association did not differ statistically across education groups. Prior research evaluating this interaction in European ancestry samples has yielded conflicting results, with some studies demonstrating that higher education may counteract the negative effects of  $\epsilon 4$  on cognitive function and dementia [16,66]. Higher education may provide greater cognitive reserve, allowing individuals to better tolerate age- and dementia-related brain pathologies and maintain cognitive function, thereby mitigating genetic risk and postponing the clinical manifestation of dementia. While we found no evidence of interaction when including a cross-product interaction term between *APOE*  $\epsilon 4$  and >0 years of education, education-stratified analysis showed that the magnitude of the association between  $\epsilon 4$  and most cognitive measures trended greater in those who never attended school compared to those who did. Lack of significant interactions may have been due, in part, to education being analyzed using a dichotomous variable based on having ever attended school, as some prior studies have suggested that the interaction between  $\epsilon 4$  and education may be at the tertiary level [66]. Although we found no interaction between  $\epsilon 4$  and tertiary education, it is likely that we lacked statistical power to detect such an interaction due to the limited number of participants with tertiary education (n=95). Further, overall sample size may have limited our power to detect smaller effects. In addition, the complex social hierarchy and high levels of social stratification in India, which we are unable to completely capture, might also influence this interaction.

Sensitivity analyses support our main findings while additionally identifying an association between the  $\epsilon 2/\epsilon 3$  genotype and lower visuospatial function compared to  $\epsilon 3/\epsilon 3$ . Despite mounting evidence suggesting a protective role of  $\epsilon 2$  against AD, previous studies examining its effect on cognition have yielded inconsistent findings. For instance, one study found that  $\epsilon 2$  carriers demonstrated worse performance in visuospatial attention in mid-adulthood [67], whereas another study in older Koreans without dementia showed that  $\epsilon 2$  carriers performed better on visuospatial measures [68]. Additional research is needed to replicate our findings and elucidate the  $\epsilon 2$  effect on cognitive function.

This study has some limitations. First, we were unable to reliably estimate the dosage effect of *APOE*  $\epsilon 4$  due to the rarity of  $\epsilon 4$  homozygotes ( $n = 36$ ). Second, LASI-DAD only included participants aged 60 or older, which may have led to selection bias. Our results might underestimate the true association between  $\epsilon 4$  and cognition since older adults carrying  $\epsilon 4$  and with poorer cognitive function might be less likely to participate due to morbidity or death. However,  $\epsilon 4$  allele frequency did not appear to decrease with age within our sample. This contrasts with findings from prior studies showing a decrease in  $\epsilon 4$  frequency with increasing age [69,70]. Notably, our study identified a similar decreasing trend in  $\epsilon 4$  up to age 85, at which point a subsequent increase was observed, which may be the result of underlying population structure differences or the small sample size of the oldest age groups. Third, despite adjusting for many potential confounders, there may be residual confounding from lifestyle factors and environmental toxicants. Fourth, all socioeconomic characteristics were self-reported and may be subject to response bias. Fifth, our study was cross-sectional with cognitive function assessed at a single time point. Consequently, we were unable to examine longitudinal  $\epsilon 4$  effects. Future studies using longitudinal cognitive measures in LASI-DAD, which are currently being collected,

could provide further insights into the intricate interplay among  $\epsilon 4$ , sociodemographics, and cognitive aging in South Asians.

In conclusion, this is the first study to investigate the effect of *APOE*  $\epsilon 4$  and its potential modification by sociodemographic factors on cognitive function in a nationally representative sample of older Indians. Our study provides important initial insights into the relationship between the strongest known genetic risk factor for AD and cognitive function in the South Asians population. Future research using longitudinal cohorts is warranted to provide a better understanding of the genetic influences on cognition and dementia within this genetically and socially diverse population.

**Table 1.** Descriptive statistics by *APOE* ε4 carrier status among 2,563 participants in LASI-DAD.

|                                                                   | Total<br>(N = 2,563) | <i>APOE</i> ε4<br>noncarrier<br>(n = 2,066) | <i>APOE</i> ε4 carrier<br>(n = 497) | P value               |
|-------------------------------------------------------------------|----------------------|---------------------------------------------|-------------------------------------|-----------------------|
| Age, mean (SD), years                                             | 69.56 (7.29)         | 69.55 (7.27)                                | 69.59 (7.39)                        | 0.996 <sup>a</sup>    |
| Female sex                                                        | 1358 (53.0%)         | 1098 (53.1%)                                | 260 (52.3%)                         | 0.777 <sup>b</sup>    |
| State of residence                                                |                      |                                             |                                     | 0.084 <sup>b</sup>    |
| Assam                                                             | 68 (2.7%)            | 47 (2.3%)                                   | 21 (4.2%)                           |                       |
| Bihar                                                             | 129 (5.0%)           | 101 (4.9%)                                  | 28 (5.6%)                           |                       |
| Delhi                                                             | 119 (4.6%)           | 94 (4.5%)                                   | 25 (5.0%)                           |                       |
| Gujarat                                                           | 220 (8.6%)           | 174 (8.4%)                                  | 46 (9.3%)                           |                       |
| Haryana                                                           | 165 (6.4%)           | 137 (6.6%)                                  | 28 (5.6%)                           |                       |
| Jammu & Kashmir                                                   | 85 (3.3%)            | 73 (3.5%)                                   | 12 (2.4%)                           |                       |
| Karnataka                                                         | 115 (4.5%)           | 98 (4.7%)                                   | 17 (3.4%)                           |                       |
| Kerala                                                            | 250 (9.8%)           | 208 (10.1%)                                 | 42 (8.5%)                           |                       |
| Madhya Pradesh                                                    | 73 (2.8%)            | 59 (2.9%)                                   | 14 (2.8%)                           |                       |
| Maharashtra                                                       | 173 (6.7%)           | 131 (6.3%)                                  | 42 (8.5%)                           |                       |
| Orissa                                                            | 206 (8.0%)           | 156 (7.6%)                                  | 50 (10.1%)                          |                       |
| Punjab                                                            | 105 (4.1%)           | 83 (4.0%)                                   | 22 (4.4%)                           |                       |
| Rajasthan                                                         | 144 (5.6%)           | 124 (6.0%)                                  | 20 (4.0%)                           |                       |
| Tamil Nadu                                                        | 155 (6.0%)           | 125 (6.1%)                                  | 30 (6.0%)                           |                       |
| Telangana                                                         | 164 (6.4%)           | 142 (6.9%)                                  | 22 (4.4%)                           |                       |
| Uttar Pradesh                                                     | 148 (5.8%)           | 114 (5.5%)                                  | 34 (6.8%)                           |                       |
| Uttaranchal                                                       | 63 (2.5%)            | 51 (2.5%)                                   | 12 (2.4%)                           |                       |
| West Bengal                                                       | 181 (7.1%)           | 149 (7.2%)                                  | 32 (6.4%)                           |                       |
| Education                                                         |                      |                                             |                                     | 0.024 <sup>b</sup>    |
| Less than lower secondary                                         | 1926 (75.1%)         | 1529 (74.0%)                                | 397 (79.9%)                         |                       |
| Upper secondary or vocational training                            | 542 (21.1%)          | 458 (22.2%)                                 | 84 (16.9%)                          |                       |
| Tertiary                                                          | 95 (3.7%)            | 79 (3.8%)                                   | 16 (3.2%)                           |                       |
| Education (dichotomous)                                           |                      |                                             |                                     | 0.067 <sup>b</sup>    |
| No formal education (0 years of education)                        | 1249 (48.7%)         | 988 (47.8%)                                 | 261 (52.5%)                         |                       |
| Some level of education (>0 years of education)                   | 1314 (51.3%)         | 1078 (52.2%)                                | 236 (47.5%)                         |                       |
| Rural residence                                                   | 1625 (63.4%)         | 1283 (62.1%)                                | 342 (68.8%)                         | 0.006 <sup>b</sup>    |
| Illiteracy (cannot read or write)                                 | 1455 (56.8%)         | 1157 (56.0%)                                | 298 (60.0%)                         | 0.121 <sup>b</sup>    |
| Caste (n = 2,550)                                                 |                      |                                             |                                     | 0.001 <sup>b</sup>    |
| Scheduled caste                                                   | 467 (18.2%)          | 376 (18.2%)                                 | 91 (18.3%)                          |                       |
| Scheduled tribe                                                   | 99 (3.9%)            | 66 (3.2%)                                   | 33 (6.6%)                           |                       |
| Other backward class                                              | 1120 (43.7%)         | 896 (43.4%)                                 | 224 (45.1%)                         |                       |
| No caste or other caste                                           | 864 (33.7%)          | 717 (34.7%)                                 | 147 (29.6%)                         |                       |
| Per capita household consumption in quintiles, rupees (n = 2,561) |                      |                                             |                                     | 0.013 <sup>b</sup>    |
| First (≤21,973)                                                   | 512 (20.0%)          | 388 (18.8%)                                 | 124 (24.9%)                         |                       |
| Second (21,973 – 30,820)                                          | 514 (20.1%)          | 416 (20.1%)                                 | 98 (19.7%)                          |                       |
| Third (30,820 – 42,489)                                           | 509 (19.9%)          | 406 (19.7%)                                 | 103 (20.7%)                         |                       |
| Fourth (42,489 – 62,668)                                          | 514 (20.1%)          | 431 (20.9%)                                 | 83 (16.7%)                          |                       |
| Fifth (≥65,206)                                                   | 512 (20.0%)          | 423 (20.5%)                                 | 89 (17.9%)                          |                       |
| HMSE score, mean (SD)                                             | 22.69 (5.38)         | 22.90 (5.17)                                | 21.79 (6.08)                        | 0.002 <sup>a</sup>    |
| General cognitive function, mean (SD)                             | 0.005 (0.91)         | 0.036 (0.90)                                | -0.124 (0.98)                       | 0.001 <sup>c</sup>    |
| Cognitive domain scores, mean (SD)                                |                      |                                             |                                     |                       |
| Orientation                                                       | -0.025 (0.79)        | 0.003 (0.78)                                | -0.143 (0.85)                       | 4.84E-04 <sup>c</sup> |
| Executive function                                                | -0.006 (0.9)         | 0.019 (0.89)                                | -0.112 (0.92)                       | 0.004 <sup>c</sup>    |
| Language/fluency                                                  | -0.032 (0.8)         | -0.006 (0.78)                               | -0.138 (0.88)                       | 0.002 <sup>c</sup>    |
| Memory                                                            | 0.021 (0.93)         | 0.053 (0.93)                                | -0.112 (0.96)                       | 0.001 <sup>c</sup>    |
| Visuospatial function                                             | 0.029 (0.83)         | 0.039 (0.82)                                | -0.008 (0.84)                       | 0.261 <sup>c</sup>    |

Abbreviations: *APOE* = apolipoprotein E; LASI-DAD = Diagnostic Assessment of Dementia for the Longitudinal Aging Study of India; SD = standard deviation. HMSE = Hindi Mental State Examination.

Note: Individuals with the *APOE* ε2/ε4 genotype were excluded from the sample. N (%) are reported unless otherwise specified.

<sup>a</sup> p-value calculated from Wilcoxon rank sum test.

<sup>b</sup> p-value calculated from Chi-square test.

<sup>c</sup> p-value calculated from t-test.

**Table 2.** Effects of *APOE*  $\epsilon$ 4 carrier status on cognitive measures in LASI-DAD.

| Cognitive Measure                 | Model 1<br>(n = 2,563) |                 |              | Model 2<br>(n = 2,548) |              |              |
|-----------------------------------|------------------------|-----------------|--------------|------------------------|--------------|--------------|
|                                   | Beta                   | P value         | $\Delta R^2$ | Beta                   | P value      | $\Delta R^2$ |
| <b>HMSE score</b>                 | <b>-0.978</b>          | <b>2.44E-05</b> | 0.51%        | <b>-0.710</b>          | <b>0.001</b> | 0.27%        |
| <b>General cognitive function</b> | <b>-0.142</b>          | <b>1.69E-04</b> | 0.37%        | <b>-0.079</b>          | <b>0.006</b> | 0.11%        |
| <b>Executive function</b>         | <b>-0.117</b>          | <b>0.002</b>    | 0.26%        | -0.057                 | 0.054        | 0.06%        |
| <b>Orientation</b>                | <b>-0.141</b>          | <b>2.86E-05</b> | 0.49%        | <b>-0.096</b>          | <b>0.001</b> | 0.22%        |
| <b>Language/fluency</b>           | <b>-0.095</b>          | <b>0.005</b>    | 0.21%        | -0.052                 | 0.064        | 0.07%        |
| <b>Memory</b>                     | <b>-0.134</b>          | <b>0.001</b>    | 0.32%        | <b>-0.087</b>          | <b>0.019</b> | 0.13%        |
| <b>Visuospatial function</b>      | -0.063                 | 0.097           | 0.09%        | -0.019                 | 0.576        | 0.01%        |

Abbreviations: APOE = apolipoprotein E; LASI-DAD = Diagnostic Assessment of Dementia for the Longitudinal Aging Study of India; HMSE = Hindi Mental State Examination.

Model 1 adjusted for age, sex, state of residence, and the top 10 genetic PCs.

Model 2 adjusted for age, sex, state of residence, top 10 genetic PCs, education (upper secondary or vocational training and tertiary education), literacy, urban/rural residence, caste, and quintiles of per capita household consumption.

$\Delta R^2$  represents the change in  $R^2$  when *APOE*  $\epsilon$ 4 carrier status was added to the corresponding regression models.

Beta coefficient and p-value in bold indicates statistically significant association at  $p < 0.05$ .

**Table 3.** Two-way interaction between *APOE*  $\epsilon$ 4 carrier status and age on cognitive measures.

|                                            | Model 1<br>(n = 2,563) |                 | Model 2<br>(n = 2,548) |                 |
|--------------------------------------------|------------------------|-----------------|------------------------|-----------------|
|                                            | Beta                   | P value         | Beta                   | P value         |
| <b>HMSE score</b>                          |                        |                 |                        |                 |
| <i>APOE</i> $\epsilon$ 4                   | <b>-0.825</b>          | <b>0.010</b>    | -0.425                 | 0.140           |
| Age > 68                                   | <b>-2.059</b>          | <b>1.02E-22</b> | <b>-1.646</b>          | <b>5.81E-18</b> |
| <i>APOE</i> $\epsilon$ 4 $\times$ Age > 68 | -0.416                 | 0.375           | -0.678                 | 0.110           |
| <b>General cognitive function*</b>         |                        |                 |                        |                 |
| <i>APOE</i> $\epsilon$ 4                   | <b>-0.122</b>          | <b>0.019</b>    | -0.026                 | 0.516           |
| Age > 68                                   | <b>-0.403</b>          | <b>1.12E-31</b> | <b>-0.295</b>          | <b>3.12E-29</b> |
| <i>APOE</i> $\epsilon$ 4 $\times$ Age > 68 | -0.058                 | 0.449           | <b>-0.126</b>          | <b>0.031</b>    |
| <b>Executive function</b>                  |                        |                 |                        |                 |
| <i>APOE</i> $\epsilon$ 4                   | <b>-0.109</b>          | <b>0.036</b>    | -0.014                 | 0.741           |
| Age > 68                                   | <b>-0.352</b>          | <b>4.49E-25</b> | <b>-0.248</b>          | <b>6.62E-20</b> |
| <i>APOE</i> $\epsilon$ 4 $\times$ Age > 68 | -0.032                 | 0.671           | -0.104                 | 0.086           |
| <b>Orientation*</b>                        |                        |                 |                        |                 |
| <i>APOE</i> $\epsilon$ 4                   | <b>-0.107</b>          | <b>0.021</b>    | -0.043                 | 0.281           |
| Age > 68                                   | <b>-0.264</b>          | <b>2.81E-18</b> | <b>-0.199</b>          | <b>5.52E-14</b> |
| <i>APOE</i> $\epsilon$ 4 $\times$ Age > 68 | -0.086                 | 0.208           | <b>-0.121</b>          | <b>0.040</b>    |
| <b>Language/fluency*</b>                   |                        |                 |                        |                 |
| <i>APOE</i> $\epsilon$ 4                   | -0.050                 | 0.284           | 0.010                  | 0.792           |
| Age > 68                                   | <b>-0.237</b>          | <b>6.66E-15</b> | <b>-0.166</b>          | <b>7.05E-11</b> |
| <i>APOE</i> $\epsilon$ 4 $\times$ Age > 68 | -0.107                 | 0.117           | <b>-0.142</b>          | <b>0.012</b>    |
| <b>Memory</b>                              |                        |                 |                        |                 |
| <i>APOE</i> $\epsilon$ 4                   | <b>-0.117</b>          | <b>0.039</b>    | -0.042                 | 0.407           |
| Age > 68                                   | <b>-0.441</b>          | <b>3.40E-32</b> | <b>-0.358</b>          | <b>2.87E-26</b> |
| <i>APOE</i> $\epsilon$ 4 $\times$ Age > 68 | -0.054                 | 0.515           | -0.108                 | 0.148           |
| <b>Visuospatial function</b>               |                        |                 |                        |                 |
| <i>APOE</i> $\epsilon$ 4                   | -0.074                 | 0.154           | -0.003                 | 0.951           |
| Age > 68                                   | <b>-0.301</b>          | <b>6.74E-19</b> | <b>-0.216</b>          | <b>5.09E-13</b> |
| <i>APOE</i> $\epsilon$ 4 $\times$ Age > 68 | 0.014                  | 0.858           | -0.041                 | 0.543           |

Abbreviations: *APOE* = apolipoprotein E; LASI-DAD = Diagnostic Assessment of Dementia for the Longitudinal Aging Study of India; HMSE = Hindi Mental State Examination.

Model 1 adjusted for age (age > 68), sex (male), state of residence, top 10 genetic PCs, and *APOE*  $\epsilon$ 4  $\times$  Age > 68.

Model 2 adjusted for age (age > 68), sex (male), state of residence, top 10 genetic PCs, education (upper secondary or vocational training and tertiary education), literacy, urban/rural residence, caste, quintiles of per capita household consumption, and *APOE*  $\epsilon$ 4  $\times$  Age > 68.

Beta coefficient and p-value in bold indicates statistically significant association at  $p < 0.05$ .

Asterisk (\*) denotes cognitive measures for which a statistically significant interaction term was observed.



**Table 4.** Associations between *APOE* ε4 carrier status and cognitive measures stratified by the median

| Cognitive Measure           | Model 1                 |              |                         |                 | Model 2                 |         |                         |                 |
|-----------------------------|-------------------------|--------------|-------------------------|-----------------|-------------------------|---------|-------------------------|-----------------|
|                             | Age ≤ 68<br>(n = 1,363) |              | Age > 68<br>(n = 1,200) |                 | Age ≤ 68<br>(n = 1,360) |         | Age > 68<br>(n = 1,188) |                 |
|                             | Beta                    | P value      | Beta                    | P value         | Beta                    | P value | Beta                    | P value         |
| HMSE score                  | <b>-0.816</b>           | <b>0.006</b> | -                       | <b>3.70E-04</b> | -0.418                  | 0.107   | <b>-1.194</b>           | <b>0.001</b>    |
| General cognitive function* | <b>-0.116</b>           | <b>0.027</b> | -                       | <b>0.001</b>    | -0.018                  | 0.618   | <b>-0.167</b>           | <b>4.28E-04</b> |
| Executive function          | <b>-0.103</b>           | <b>0.049</b> | -                       | <b>0.006</b>    | -0.006                  | 0.884   | <b>-0.131</b>           | <b>0.006</b>    |
| Orientation*                | <b>-0.103</b>           | <b>0.020</b> | -                       | <b>1.00E-04</b> | -0.043                  | 0.244   | <b>-0.182</b>           | <b>1.54E-04</b> |
| Language/fluency*           | -0.048                  | 0.275        | -                       | <b>0.002</b>    | 0.013                   | 0.706   | <b>-0.140</b>           | <b>0.003</b>    |
| Memory                      | -0.103                  | 0.072        | -                       | <b>0.002</b>    | -0.027                  | 0.588   | <b>-0.172</b>           | <b>0.003</b>    |
| Visuospatial function       | -0.073                  | 0.168        | -                       | 0.301           | -0.008                  | 0.860   | -0.040                  | 0.423           |

age of the sample.

Abbreviations: *APOE* = apolipoprotein E; HMSE = Hindi Mental State Examination.

Model 1 adjusted for sex, state of residence, and top 10 genetic PCs.

Model 2 adjusted for sex, state of residence, top 10 genetic PCs, education (upper secondary or vocational training and tertiary education), literacy, urban/rural residence, caste, and quintiles of per capita household consumption.

Beta coefficient and p-value in bold indicates statistically significant association at  $p < 0.05$ .

Asterisk (\*) denotes cognitive measures for which a statistically significant interaction term was observed.

**Table 5.** Two-way interaction between *APOE*  $\epsilon 4$  carrier status and sex on cognitive measures.

|                                        | Model 1<br>(n = 2,563) |                 | Model 2<br>(n = 2,548) |                 |
|----------------------------------------|------------------------|-----------------|------------------------|-----------------|
|                                        | Beta                   | P value         | Beta                   | P value         |
| <b>HMSE score</b>                      |                        |                 |                        |                 |
| <i>APOE</i> $\epsilon 4$               | <b>-1.334</b>          | <b>3.00E-05</b> | <b>-0.997</b>          | <b>0.001</b>    |
| Male                                   | <b>3.196</b>           | <b>9.87E-53</b> | <b>1.696</b>           | <b>1.94E-17</b> |
| <i>APOE</i> $\epsilon 4$ $\times$ Male | 0.748                  | 0.105           | 0.603                  | 0.149           |
| <b>General cognitive function</b>      |                        |                 |                        |                 |
| <i>APOE</i> $\epsilon 4$               | <b>-0.199</b>          | <b>1.34E-04</b> | <b>-0.121</b>          | <b>0.002</b>    |
| Male                                   | <b>0.611</b>           | <b>1.53E-70</b> | <b>0.232</b>           | <b>2.20E-17</b> |
| <i>APOE</i> $\epsilon 4$ $\times$ Male | 0.120                  | 0.112           | 0.089                  | 0.121           |
| <b>Executive function</b>              |                        |                 |                        |                 |
| <i>APOE</i> $\epsilon 4$               | <b>-0.128</b>          | <b>0.014</b>    | -0.056                 | 0.177           |
| Male                                   | <b>0.637</b>           | <b>6.23E-77</b> | <b>0.287</b>           | <b>7.69E-24</b> |
| <i>APOE</i> $\epsilon 4$ $\times$ Male | 0.023                  | 0.762           | -0.004                 | 0.951           |
| <b>Orientation</b>                     |                        |                 |                        |                 |
| <i>APOE</i> $\epsilon 4$               | <b>-0.203</b>          | <b>1.26E-05</b> | <b>-0.145</b>          | <b>3.50E-04</b> |
| Male                                   | <b>0.628</b>           | <b>2.72E-91</b> | <b>0.378</b>           | <b>6.79E-41</b> |
| <i>APOE</i> $\epsilon 4$ $\times$ Male | 0.130                  | 0.053           | 0.103                  | 0.079           |
| <b>Language/fluency*</b>               |                        |                 |                        |                 |
| <i>APOE</i> $\epsilon 4$               | <b>-0.166</b>          | <b>3.88E-04</b> | <b>-0.110</b>          | <b>0.005</b>    |
| Male                                   | <b>0.355</b>           | <b>8.35E-32</b> | <b>0.068</b>           | <b>0.010</b>    |
| <i>APOE</i> $\epsilon 4$ $\times$ Male | <b>0.149</b>           | <b>0.027</b>    | <b>0.121</b>           | <b>0.031</b>    |
| <b>Memory*</b>                         |                        |                 |                        |                 |
| <i>APOE</i> $\epsilon 4$               | <b>-0.223</b>          | <b>8.44E-05</b> | <b>-0.168</b>          | <b>0.001</b>    |
| Male                                   | <b>0.172</b>           | <b>2.09E-06</b> | <b>-0.101</b>          | <b>0.004</b>    |
| <i>APOE</i> $\epsilon 4$ $\times$ Male | <b>0.185</b>           | <b>0.024</b>    | <b>0.171</b>           | <b>0.020</b>    |
| <b>Visuospatial function</b>           |                        |                 |                        |                 |
| <i>APOE</i> $\epsilon 4$               | -0.088                 | 0.091           | -0.033                 | 0.471           |
| Male                                   | <b>0.441</b>           | <b>1.92E-38</b> | <b>0.148</b>           | <b>2.66E-06</b> |
| <i>APOE</i> $\epsilon 4$ $\times$ Male | 0.054                  | 0.478           | 0.030                  | 0.647           |

Abbreviations: *APOE* = apolipoprotein E; LASI-DAD = Diagnostic Assessment of Dementia for the Longitudinal Aging Study of India; HMSE = Hindi Mental State Examination.

Model 1 adjusted for age, sex (male), state of residence, top 10 genetic PCs, and *APOE*  $\epsilon 4$   $\times$  male.

Model 2 adjusted for age, sex (male), state of residence, top 10 genetic PCs, education (upper secondary or vocational training and tertiary education), literacy, urban/rural residence, caste, quintiles of per capita household consumption, and *APOE*  $\epsilon 4$   $\times$  male.

Beta coefficient and p-value in bold indicates statistically significant association at  $p < 0.05$ .

Asterisk (\*) denotes cognitive measures for which a statistically significant interaction term was observed.

| Cognitive Measure          | Model 1             |         |                       |                      | Model 2             |         |                       |              |
|----------------------------|---------------------|---------|-----------------------|----------------------|---------------------|---------|-----------------------|--------------|
|                            | Male<br>(n = 1,205) |         | Female<br>(n = 1,358) |                      | Male<br>(n = 1,200) |         | Female<br>(n = 1,348) |              |
|                            | Beta                | P value | Beta                  | P value              | Beta                | P value | Beta                  | P value      |
| HMSE score                 | -0.522              | 0.105   | -<br><b>1.249</b>     | <b>1.72E-<br/>04</b> | -0.395              | 0.171   | <b>-0.904</b>         | <b>0.003</b> |
| General cognitive function | -0.072              | 0.202   | -<br><b>0.187</b>     | <b>2.09E-<br/>04</b> | -0.037              | 0.386   | <b>-0.113</b>         | <b>0.004</b> |
| Executive function         | -0.098              | 0.091   | -<br><b>0.118</b>     | <b>0.016</b>         | -0.060              | 0.186   | -0.052                | 0.191        |
| Orientation                | -0.056              | 0.235   | -<br><b>0.203</b>     | <b>2.16E-<br/>05</b> | -0.039              | 0.340   | <b>-0.144</b>         | <b>0.001</b> |
| Language/fluency*          | -0.013              | 0.795   | -<br><b>0.147</b>     | <b>0.001</b>         | 0.006               | 0.884   | <b>-0.092</b>         | <b>0.017</b> |
| Memory*                    | -0.037              | 0.532   | -<br><b>0.206</b>     | <b>2.66E-<br/>04</b> | -0.012              | 0.822   | <b>-0.150</b>         | <b>0.003</b> |
| Visuospatial function      | -0.041              | 0.471   | -<br>0.084            | 0.095                | -0.009              | 0.854   | -0.031                | 0.493        |

**Table 6.** Associations between *APOE*  $\epsilon$ 4 carrier status and cognitive measures stratified by sex.

Abbreviations: APOE = apolipoprotein E; HMSE = Hindi Mental State Examination.

Model 1 adjusted for age, state of residence, and top 10 genetic PCs.

Model 2 adjusted for age, state of residence, top 10 genetic PCs, education (upper secondary or vocational training and tertiary education), literacy, urban/rural residence, caste, and quintiles of per capita household consumption.

Beta coefficient and p-value in bold indicates statistically significant association at  $p < 0.05$ .

Asterisk (\*) denotes cognitive measures for which a statistically significant interaction term was observed.

**Figure 1.** Plots of significant two-way interactions between *APOE*  $\epsilon 4$  and age on cognitive measures. Predicted general cognitive function score (A), orientation score (B), and language/fluency score (C) of *APOE*  $\epsilon 4$  carriers and noncarriers are shown with standard error bars by age group. Cognitive measures are predicted using models adjusted for age (age >68), sex (male), state of residence, top 10 genetic PCs, education (upper secondary or vocational training and tertiary education), urban/rural residence, literacy, caste, quintiles of per capita household consumption, and *APOE*  $\epsilon 4$   $\times$  age >68 (Model 2). Color coding is according to age group.

Abbreviations: APOE = apolipoprotein E; PC = principal components.

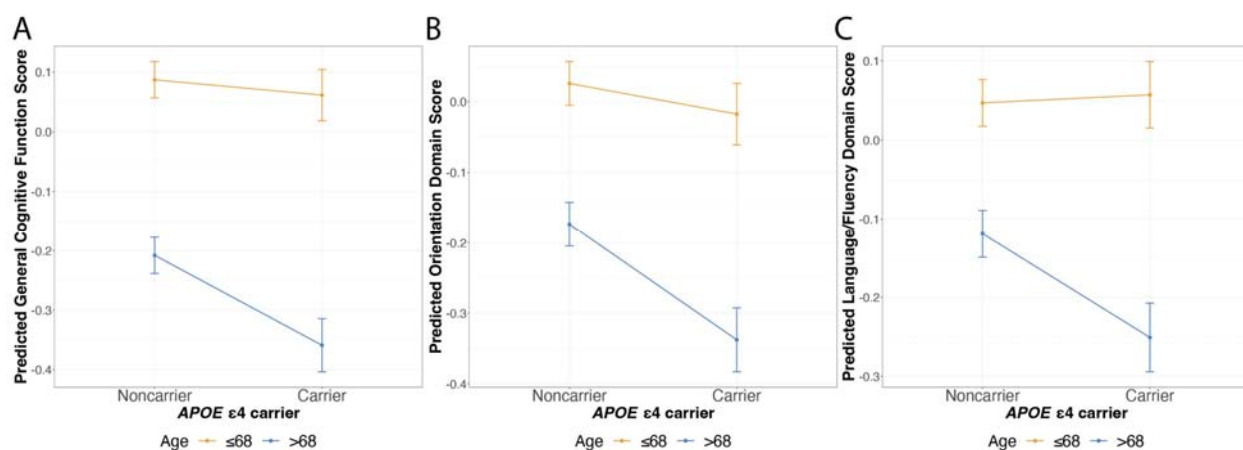

**Figure 2.** Plots of significant two-way interactions between *APOE*  $\epsilon 4$  and sex on cognitive measures. Predicted memory score (A) and language/fluency score (B) of *APOE*  $\epsilon 4$  carriers and noncarriers are shown with standard error bars by sex. Cognitive measures are predicted using models adjusted for age, sex (male), state of residence, top 10 genetic PCs, education, urban/rural residence, literacy, caste, quintiles of per capita household consumption, and *APOE*  $\epsilon 4 \times$  male (Model 2). Color coding is according to sex. Abbreviations: APOE = apolipoprotein E; PC = principal components.

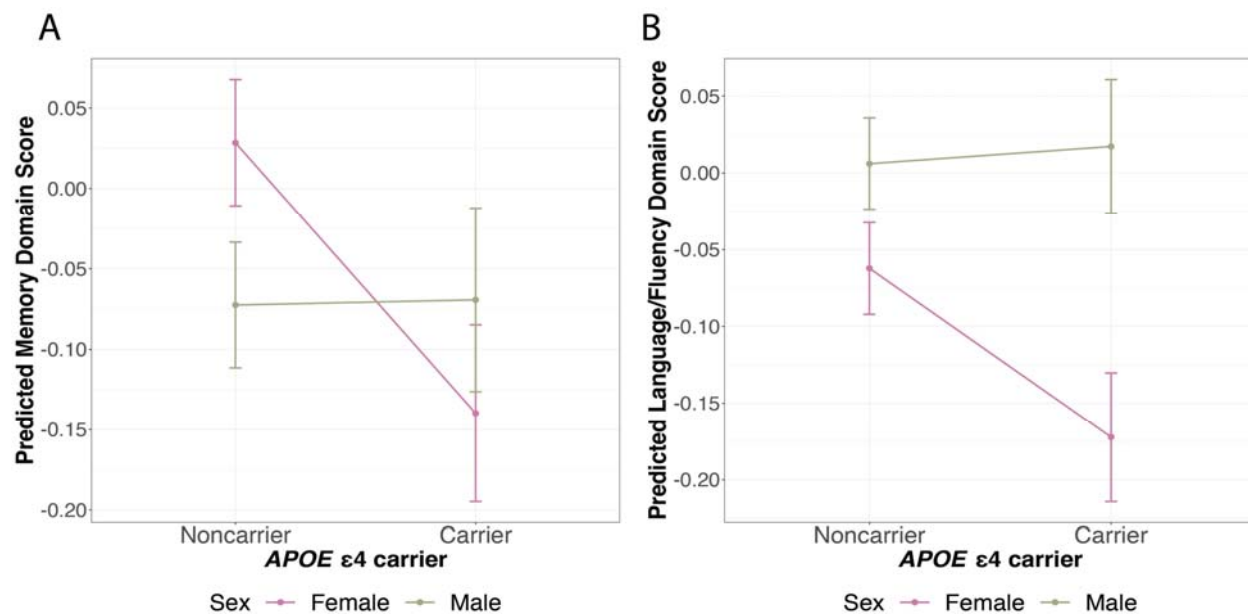

## REFERENCES

- [1] GBD 2019 Collaborators. Global mortality from dementia: Application of a new method and results from the Global Burden of Disease Study 2019. *Alzheimers Dement (N Y)* 2021;7:e12200. <https://doi.org/10.1002/trc2.12200>.
- [2] Prince MJ, Wimo A, Guerchet MM, Ali GC, Wu Y-T, Prina M. *World Alzheimer Report 2015 - The Global Impact of Dementia: An analysis of prevalence, incidence, cost and trends*. London: Alzheimer's Disease International; 2015.
- [3] Liu C-C, Kanekiyo T, Xu H, Bu G. Apolipoprotein E and Alzheimer disease: risk, mechanisms and therapy. *Nat Rev Neurol* 2013;9:106–18. <https://doi.org/10.1038/nrneurol.2012.263>.
- [4] Reitz C, Mayeux R. Genetics of Alzheimer's Disease in Caribbean Hispanic and African American Populations. *Biological Psychiatry* 2014;75:534–41. <https://doi.org/10.1016/j.biopsych.2013.06.003>.
- [5] Miyashita A, Kikuchi M, Hara N, Ikeuchi T. Genetics of Alzheimer's disease: an East Asian perspective. *J Hum Genet* 2023;68:115–24. <https://doi.org/10.1038/s10038-022-01050-z>.
- [6] Farrer LA, Cupples LA, Haines JL, Hyman B, Kukull WA, Mayeux R, et al. Effects of age, sex, and ethnicity on the association between apolipoprotein E genotype and Alzheimer disease: a meta-analysis. *Jama* 1997;278:1349–56.
- [7] O'Donoghue MC, Murphy SE, Zamboni G, Nobre AC, Mackay CE. APOE genotype and cognition in healthy individuals at risk of Alzheimer's disease: A review. *Cortex* 2018;104:103–23. <https://doi.org/10.1016/j.cortex.2018.03.025>.
- [8] Van Hooren SAH, Valentijn AM, Bosma H, Ponds R, Van Boxtel MPJ, Jolles J. Cognitive functioning in healthy older adults aged 64–81: A cohort study into the effects of age, sex, and education. *Aging, Neuropsychology, and Cognition* 2007;14:40–54.
- [9] Gao S, Hendrie HC, Hall KS, Hui S. The relationships between age, sex, and the incidence of dementia and Alzheimer disease: a meta-analysis. *Arch Gen Psychiatry* 1998;55:809–15. <https://doi.org/10.1001/archpsyc.55.9.809>.
- [10] Letenneur L, Gilleron V, Commenges D, Helmer C, Orgogozo JM, Dartigues JF. Are sex and educational level independent predictors of dementia and Alzheimer's disease? Incidence data from the PAQUID project. *Journal of Neurology, Neurosurgery & Psychiatry* 1999;66:177–83. <https://doi.org/10.1136/jnnp.66.2.177>.
- [11] Saddiki H, Fayosse A, Cognat E, Sabia S, Engelborghs S, Wallon D, et al. Age and the association between apolipoprotein E genotype and Alzheimer disease: A cerebrospinal fluid biomarker-based case-control study. *PLoS Med* 2020;17:e1003289. <https://doi.org/10.1371/journal.pmed.1003289>.
- [12] Bellou E, Baker E, Leonenko G, Bracher-Smith M, Daunt P, Menzies G, et al. Age-dependent effect of APOE and polygenic component on Alzheimer's disease. *Neurobiology of Aging* 2020;93:69–77. <https://doi.org/10.1016/j.neurobiolaging.2020.04.024>.
- [13] Payami H, Montee KR, Kaye JA, Bird TD, Yu CE, Wijsman EM, et al. Alzheimer's disease, apolipoprotein E4, and gender. *JAMA* 1994;271:1316–7.
- [14] Bretsky PM, Buckwalter JG, Seeman TE, Miller CA, Poirier J, Schellenberg GD, et al. Evidence for an interaction between apolipoprotein E genotype, gender, and Alzheimer

- disease. *Alzheimer Dis Assoc Disord* 1999;13:216–21. <https://doi.org/10.1097/00002093-199910000-00007>.
- [15] Altmann A, Tian L, Henderson VW, Greicius MD, Alzheimer's Disease Neuroimaging Initiative Investigators. Sex modifies the APOE-related risk of developing Alzheimer disease. *Ann Neurol* 2014;75:563–73. <https://doi.org/10.1002/ana.24135>.
- [16] Wang H-X, Gustafson DR, Kivipelto M, Pedersen NL, Skoog I, Windblad B, et al. Education halves the risk of dementia due to apolipoprotein  $\epsilon 4$  allele: a collaborative study from the Swedish Brain Power initiative. *Neurobiology of Aging* 2012;33:1007.e1-1007.e7. <https://doi.org/10.1016/j.neurobiolaging.2011.10.003>.
- [17] Ma H, Zhou T, Li X, Maraganore D, Heianza Y, Qi L. Early-life educational attainment, APOE  $\epsilon 4$  alleles, and incident dementia risk in late life. *Geroscience* 2022;44:1479–88. <https://doi.org/10.1007/s11357-022-00545-z>.
- [18] Mortensen EL, Høgh P. A gender difference in the association between APOE genotype and age-related cognitive decline. *Neurology* 2001;57:89–95.
- [19] Beydoun MA, Boueiz A, Abougergi MS, Kitner-Triolo MH, Beydoun HA, Resnick SM, et al. Sex differences in the association of the apolipoprotein E epsilon 4 allele with incidence of dementia, cognitive impairment, and decline. *Neurobiol Aging* 2012;33:720-731.e4. <https://doi.org/10.1016/j.neurobiolaging.2010.05.017>.
- [20] Shadlen M-F, Larson EB, Wang L, Phelan EA, McCormick WC, Jolley L, et al. Education modifies the effect of apolipoprotein epsilon 4 on cognitive decline. *Neurobiology of Aging* 2005;26:17–24. <https://doi.org/10.1016/j.neurobiolaging.2004.03.005>.
- [21] Seeman TE, Huang M-H, Bretsky P, Crimmins E, Launer L, Guralnik JM. Education and APOE- $\epsilon 4$  in Longitudinal Cognitive Decline: MacArthur Studies of Successful Aging. *The Journals of Gerontology: Series B* 2005;60:P74–83. <https://doi.org/10.1093/geronb/60.2.P74>.
- [22] Wisdom NM, Callahan JL, Hawkins KA. The effects of apolipoprotein E on non-impaired cognitive functioning: a meta-analysis. *Neurobiol Aging* 2011;32:63–74. <https://doi.org/10.1016/j.neurobiolaging.2009.02.003>.
- [23] Lyall DM, Ward J, Ritchie SJ, Davies G, Cullen B, Celis C, et al. Alzheimer disease genetic risk factor *APOE*  $\epsilon 4$  and cognitive abilities in 111,739 UK Biobank participants. *Age Ageing* 2016;45:511–7. <https://doi.org/10.1093/ageing/afw068>.
- [24] Small BJ, Graves AB, McEvoy CL, Crawford FC, Mullan M, Mortimer JA. Is *APOE* - $\epsilon 4$  a risk factor for cognitive impairment in normal aging? *Neurology* 2000;54:2082–8. <https://doi.org/10.1212/WNL.54.11.2082>.
- [25] Bickeböller H, Campion D, Brice A, Amouyel P, Hannequin D, Didierjean O, et al. Apolipoprotein E and Alzheimer disease: genotype-specific risks by age and sex. *Am J Hum Genet* 1997;60:439–46.
- [26] Neu SC, Pa J, Kukull W, Beekly D, Kuzma A, Gangadharan P, et al. Apolipoprotein E Genotype and Sex Risk Factors for Alzheimer Disease: A Meta-analysis. *JAMA Neurol* 2017;74:1178–89. <https://doi.org/10.1001/jamaneurol.2017.2188>.
- [27] Hsiung G-YR. Apolipoprotein E 4 genotype as a risk factor for cognitive decline and dementia: data from the Canadian Study of Health and Aging. *Canadian Medical Association Journal* 2004;171:863–7. <https://doi.org/10.1503/cmaj.1031789>.



- [28] Lambert JC, Ibrahim-Verbaas CA, Harold D, Naj AC, Sims R, Bellenguez C, et al. Meta-analysis of 74,046 individuals identifies 11 new susceptibility loci for Alzheimer's disease. *Nat Genet* 2013;45:1452–8. <https://doi.org/10.1038/ng.2802>.
- [29] Jansen IE, Savage JE, Watanabe K, Bryois J, Williams DM, Steinberg S, et al. Genome-wide meta-analysis identifies new loci and functional pathways influencing Alzheimer's disease risk. *Nat Genet* 2019;51:404–13. <https://doi.org/10.1038/s41588-018-0311-9>.
- [30] Kunkle BW, Grenier-Boley B, Sims R, Bis JC, Damotte V, Naj AC, et al. Genetic meta-analysis of diagnosed Alzheimer's disease identifies new risk loci and implicates A $\beta$ , tau, immunity and lipid processing. *Nat Genet* 2019;51:414–30. <https://doi.org/10.1038/s41588-019-0358-2>.
- [31] Wightman DP, Jansen IE, Savage JE, Shadrin AA, Bahrami S, Holland D, et al. A genome-wide association study with 1,126,563 individuals identifies new risk loci for Alzheimer's disease. *Nat Genet* 2021;53:1276–82. <https://doi.org/10.1038/s41588-021-00921-z>.
- [32] Bellenguez C, Küçükali F, Jansen IE, Kleindam L, Moreno-Grau S, Amin N, et al. New insights into the genetic etiology of Alzheimer's disease and related dementias. *Nat Genet* 2022;54:412–36. <https://doi.org/10.1038/s41588-022-01024-z>.
- [33] Martin AR, Gignoux CR, Walters RK, Wojcik GL, Neale BM, Gravel S, et al. Human Demographic History Impacts Genetic Risk Prediction across Diverse Populations. *The American Journal of Human Genetics* 2017;100:635–49. <https://doi.org/10.1016/j.ajhg.2017.03.004>.
- [34] Naslavsky MS, Suemoto CK, Brito LA, Scliar MO, Ferretti-Rebustini RE, Rodriguez RD, et al. Global and local ancestry modulate APOE association with Alzheimer's neuropathology and cognitive outcomes in an admixed sample. *Mol Psychiatry* 2022;27:4800–8. <https://doi.org/10.1038/s41380-022-01729-x>.
- [35] Ganguli M, Chandra V, Kamboh MI, Johnston JM, Dodge HH, Thelma BK, et al. Apolipoprotein E polymorphism and Alzheimer disease: The Indo-US Cross-National Dementia Study. *Arch Neurol* 2000;57:824–30. <https://doi.org/10.1001/archneur.57.6.824>.
- [36] Agarwal R, Tripathi CB. Association of Apolipoprotein E Genetic Variation in Alzheimer's Disease in Indian Population: A Meta-Analysis. *Am J Alzheimers Dis Other Demen* 2014;29:575–82. <https://doi.org/10.1177/1533317514531443>.
- [37] Shankarappa BM, Kota LN, Purushottam M, Nagpal K, Mukherjee O, Viswanath B, et al. Effect of CLU and PICALM polymorphisms on AD risk: A study from south India. *Asian Journal of Psychiatry* 2017;27:7–11. <https://doi.org/10.1016/j.ajp.2016.12.017>.
- [38] Misra A, Chakrabarti SS, Gambhir IS, Kaur U, Prasad S. APOE4 allele in north Indian elderly patients with dementia or late onset depression—a multiple-disease case control study. *Mol Biol Res Commun* 2019;8:135–40. <https://doi.org/10.22099/mbrc.2019.34417.1427>.
- [39] Arokiasamy P, Bloom D, Lee J, Feeney K, Ozolins M. Longitudinal aging study in India: Vision, design, implementation, and preliminary findings. *Aging in Asia: Findings from new and emerging data initiatives*, National Academies Press (US); 2012.
- [40] Lee J, Petrosyan S, Khobragade P, Banerjee J, Chien S, Weerman B, et al. Deep phenotyping and genomic data from a nationally representative study on dementia in India. *Sci Data* 2023;10:45. <https://doi.org/10.1038/s41597-023-01941-6>.
- [41] Leung YY, Valladares O, Chou Y-F, Lin H-J, Kuzma AB, Cantwell L, et al. VCPA: genomic variant calling pipeline and data management tool for Alzheimer's Disease



- Sequencing Project. *Bioinformatics* 2019;35:1768–70.  
<https://doi.org/10.1093/bioinformatics/bty894>.
- [42] Lee J, Dey AB. Introduction to LASI-DAD: The Longitudinal Aging Study in India-Diagnostic Assessment of Dementia. *J American Geriatrics Society* 2020;68.  
<https://doi.org/10.1111/jgs.16740>.
- [43] Morgulis A, Gertz EM, Schäffer AA, Agarwala R. A Fast and Symmetric DUST Implementation to Mask Low-Complexity DNA Sequences. *Journal of Computational Biology* 2006;13:1028–40. <https://doi.org/10.1089/cmb.2006.13.1028>.
- [44] Conomos MP, Miller MB, Thornton TA. Robust inference of population structure for ancestry prediction and correction of stratification in the presence of relatedness. *Genetic Epidemiology* 2015;39:276–93.
- [45] Ganguli M, Ratcliff G, Chandra V, Sharma S, Gilby J, Pandav R, et al. A Hindi version of the MMSE: the development of a cognitive screening instrument for a largely illiterate rural elderly population in India. *International Journal of Geriatric Psychiatry* 1995;10:367–77.
- [46] Gross AL, Khobragade PY, Meijer E, Saxton JA. Measurement and Structure of Cognition in the Longitudinal Aging Study in India–Diagnostic Assessment of Dementia. *J Am Geriatr Soc* 2020;68:S11–9. <https://doi.org/10.1111/jgs.16738>.
- [47] NSO. Elderly in India 2021. National Statistical Office, Ministry of Statistics and Programme Implementation, Government of India, New Delhi; 2021.
- [48] Chen S, Francioli LC, Goodrich JK, Collins RL, Kanai M, Wang Q, et al. A genome-wide mutational constraint map quantified from variation in 76,156 human genomes. *Genetics*; 2022. <https://doi.org/10.1101/2022.03.20.485034>.
- [49] Small BJ, Rosnick CB, Fratiglioni L, Bäckman L. Apolipoprotein E and cognitive performance: a meta-analysis. *Psychol Aging* 2004;19:592–600.  
<https://doi.org/10.1037/0882-7974.19.4.592>.
- [50] Smith JA, Zhao W, Yu M, Rumfelt KE, Moorjani P, Ganna A, et al. Association Between Episodic Memory and Genetic Risk Factors for Alzheimer’s Disease in South Asians from the Longitudinal Aging Study in India-Diagnostic Assessment of Dementia (LASI-DAD). *J Am Geriatr Soc* 2020;68 Suppl 3:S45–53. <https://doi.org/10.1111/jgs.16735>.
- [51] Zhao W, Smith JA, Wang YZ, Chintalapati M, Ammous F, Yu M, et al. Polygenic Risk Scores for Alzheimer’s Disease and General Cognitive Function Are Associated With Measures of Cognition in Older South Asians. *The Journals of Gerontology: Series A* 2023;78:743–52. <https://doi.org/10.1093/gerona/glad057>.
- [52] Davies G, Armstrong N, Bis JC, Bressler J, Chouraki V, Giddaluru S, et al. Genetic contributions to variation in general cognitive function: a meta-analysis of genome-wide association studies in the CHARGE consortium (N=53949). *Mol Psychiatry* 2015;20:183–92. <https://doi.org/10.1038/mp.2014.188>.
- [53] Laukka EJ, Lövdén M, Herlitz A, Karlsson S, Ferencz B, Pantzar A, et al. Genetic effects on old-age cognitive functioning: A population-based study. *Psychology and Aging* 2013;28:262–74. <https://doi.org/10.1037/a0030829>.
- [54] Lindenberger U, Nagel IE, Chicherio C, Li S-C, Heekeren HR, Bäckman L. Age-related decline in brain resources modulates genetic effects on cognitive functioning. *Front Neurosci* 2008;2:234–44. <https://doi.org/10.3389/neuro.01.039.2008>.

- [55] Papenberg G, Salami A, Persson J, Lindenberger U, Bäckman L. Genetics and functional imaging: effects of APOE, BDNF, COMT, and KIBRA in aging. *Neuropsychol Rev* 2015;25:47–62. <https://doi.org/10.1007/s11065-015-9279-8>.
- [56] Bunce D, Bielak AAM, Anstey KJ, Cherbuin N, Batterham PJ, Eastaer S. APOE genotype and cognitive change in young, middle-aged, and older adults living in the community. *J Gerontol A Biol Sci Med Sci* 2014;69:379–86. <https://doi.org/10.1093/gerona/glt103>.
- [57] Poirier J, Bertrand P, Poirier J, Kogan S, Gauthier S, Poirier J, et al. Apolipoprotein E polymorphism and Alzheimer's disease. *The Lancet* 1993;342:697–9. [https://doi.org/10.1016/0140-6736\(93\)91705-Q](https://doi.org/10.1016/0140-6736(93)91705-Q).
- [58] Payami H, Montee KR, Kaye JA, Bird TD, Yu C-E, Wijsman EM, et al. Alzheimer's disease, apolipoprotein E4, and gender. *Jama* 1994;271:1316–7.
- [59] Hohman TJ, Dumitrescu L, Barnes LL, Thambisetty M, Beecham G, Kunkle B, et al. Sex-Specific Association of Apolipoprotein E With Cerebrospinal Fluid Levels of Tau. *JAMA Neurol* 2018;75:989. <https://doi.org/10.1001/jamaneurol.2018.0821>.
- [60] Damoiseaux JS, Seeley WW, Zhou J, Shirer WR, Coppola G, Karydas A, et al. Gender Modulates the APOE 4 Effect in Healthy Older Adults: Convergent Evidence from Functional Brain Connectivity and Spinal Fluid Tau Levels. *Journal of Neuroscience* 2012;32:8254–62. <https://doi.org/10.1523/JNEUROSCI.0305-12.2012>.
- [61] Sampedro F, Vilaplana E, de Leon MJ, Alcolea D, Pegueroles J, Montal V, et al. APOE-by-sex interactions on brain structure and metabolism in healthy elderly controls. *Oncotarget* 2015;6:26663–74. <https://doi.org/10.18632/oncotarget.5185>.
- [62] Hyman BT, Gomez-Isla T, Briggs M, Chung H, Nichols S, Kohout F, et al. Apolipoprotein E and cognitive change in an elderly population. *Ann Neurol* 1996;40:55–66. <https://doi.org/10.1002/ana.410400111>.
- [63] Wang X, Zhou W, Ye T, Lin X, Zhang J, for Alzheimer's Disease Neuroimaging Initiative. Sex Difference in the Association of APOE4 with Memory Decline in Mild Cognitive Impairment. *Journal of Alzheimer's Disease* 2019;69:1161–9. <https://doi.org/10.3233/JAD-181234>.
- [64] Gamache J, Yun Y, Chiba-Falek O. Sex-dependent effect of *APOE* on Alzheimer's disease and other age-related neurodegenerative disorders. *Disease Models & Mechanisms* 2020;13:dmm045211. <https://doi.org/10.1242/dmm.045211>.
- [65] Lyall DM, Celis-Morales C, Lyall LM, Graham C, Graham N, Mackay DF, et al. Assessing for interaction between *APOE*  $\epsilon$ 4, sex, and lifestyle on cognitive abilities. *Neurology* 2019;92:e2691–8. <https://doi.org/10.1212/WNL.0000000000007551>.
- [66] Lee M, Hughes TM, George KM, Griswold ME, Sedaghat S, Simino J, et al. Education and Cardiovascular Health as Effect Modifiers of APOE  $\epsilon$ 4 on Dementia: The Atherosclerosis Risk in Communities Study. *The Journals of Gerontology: Series A* 2022;77:1199–207. <https://doi.org/10.1093/gerona/glab299>.
- [67] Lancaster C, Forster S, Tabet N, Rusted J. Putting attention in the spotlight: The influence of APOE genotype on visual search in mid adulthood. *Behavioural Brain Research* 2017;334:97–104. <https://doi.org/10.1016/j.bbr.2017.07.015>.
- [68] Chey J, Kim J-W, Cho H-Y. Effects of apolipoprotein E phenotypes on the neuropsychological functions of community-dwelling elderly individuals without dementia. *Neuroscience Letters* 2000;289:230–4. [https://doi.org/10.1016/S0304-3940\(00\)01288-X](https://doi.org/10.1016/S0304-3940(00)01288-X).

- [69] Mostafavi H, Berisa T, Day FR, Perry JRB, Przeworski M, Pickrell JK. Identifying genetic variants that affect viability in large cohorts. *PLoS Biol* 2017;15:e2002458. <https://doi.org/10.1371/journal.pbio.2002458>.
- [70] McKay GJ, Silvestri G, Chakravarthy U, Dasari S, Fritsche LG, Weber BH, et al. Variations in Apolipoprotein E Frequency With Age in a Pooled Analysis of a Large Group of Older People. *American Journal of Epidemiology* 2011;173:1357–64. <https://doi.org/10.1093/aje/kwr015>.

## **FUNDING**

This project is funded by the National Institute on Aging (R01 AG051125, U01 AG065948). The study sponsor had no role in the design and conduct of the study; in the collection, analysis, and interpretation of the data; or in the preparation, review, or approval of the manuscript.

## **CONFLICT OF INTEREST**

The authors have no conflicts of interest to disclose.

## **CONSENT STATEMENT**

Informed consent was obtained from all participants included in the study.

## **KEYWORDS**

*APOE*, cognitive function, dementia, sociodemographic characteristics, interaction, South Asian,

India
